# Supplementary material for: Construction strategies to modulate the photocatalytic efficiency of Cd(ii) MOFs to photodegrade organic dyes
Source: Royal Society of Chemistry journal article supplement (doi:10.1039/d2ce01281b), 2022-01-01
Supplement: d2ce01281b1.pdf [file d2ce01281b1.pdf]

## Supporting Information

### *Materials and Methods*

All the reagents to perform synthesis obtained from commercial sources were of analytical grade and used without further purification. Powder X-ray diffraction (PXRD) data were collected using Bruker ADVANCE X-ray diffractometer with Cu-K $\alpha$  radiation ( $\lambda=1.5418$  Å) at 50 kV, 20 mA with a scanning rate of 6°/min and a step size of 0.02°. Fourier transforms infrared (FT-IR) spectrum for **1** in KBr disc was recorded on Nicolet Impact 750 FTIR in the range of 400-4000 cm<sup>-1</sup>. Thermogravimetric analysis (TGA) was performed under nitrogen atmosphere from room temperature to 800 °C at a heating rate of 10 °C min<sup>-1</sup>. The photocatalytic investigations were carried out using Shimadzu UV-Vis 2501PC recording spectrophotometer.

### *X-ray Crystallography*

The single crystal X-ray diffraction data for **1-2** was collected using Bruker SMART APEX diffractometer equipped with graphite monochromated MoK $\alpha$  radiation ( $\lambda = 0.71073$  Å) employing  $\omega$ -scan technique. The structure was solved by direct method (SHLEXS-2014) and refined using the full-matrix least-square procedure based on  $F^2$  (Shelxl-2014). All the hydrogen atoms were generated geometrically and refined isotropically employing riding model while non-hydrogen atoms were refined with anisotropic displacement parameters. Crystallographic details and selected bond dimensions for **1-2** are listed in Tables S1-S3, respectively. CCDC number: 2183494-2183495.

### *Photocatalytic Method*

The finely divided powder of **1** or **2** (40 mg) was dispersed in 50 mL aqueous solutions of MB, MO and Rh B (10 mg/L) and the mixtures were stirred in dark for 30 min to ensure the establishment of adsorption-desorption equilibrium. The photocatalytic degradations of dyes were conducted on UV-400 type photochemical reactor having 100 W mercury lamp (mean wavelength 365 nm). Aliquots of 5.0 mL were isolated at specified time intervals and separated through centrifugation and then subsequently the intensity of UV-Vis bands of dyes were recorded using UV-visible

spectrophotometer. These control experiments were also conducted where the photodecompositions of dyes were performed under the identical conditions without adding **1** and **2**.

The electrochemical measurements were performed in an electrochemical workstation (CHI660C Apparatuses) with a three electrode system, including a saturated calomel reference electrode, a platinum auxiliary electrode and a glassy carbon disk electrode (GCE, 3 mm). Samples and 0.5 mL DMF were well mixed into a 5 mL centrifuge tube to form a uniform suspension under sonification. 5.0  $\mu$ L Samples **1/2** suspension was coated on the GCE surface to prepare a working electrode. 0.2 M  $\text{Na}_2\text{SO}_4$  solution was used as the electrolyte in the all electrochemical measurements. EIS plots were recorded under dark circumstance at open circuit potential in the frequency range between  $10^{-2}$  and  $10^5$  Hz. The ozone gas (30 mg/L, 25 mL/min) was inlet into the  $\text{Na}_2\text{SO}_4$  solution for 30 min if needed. The Mott-Schottky measurement was conducted to measure the band positions of the samples using impedance-potential model.

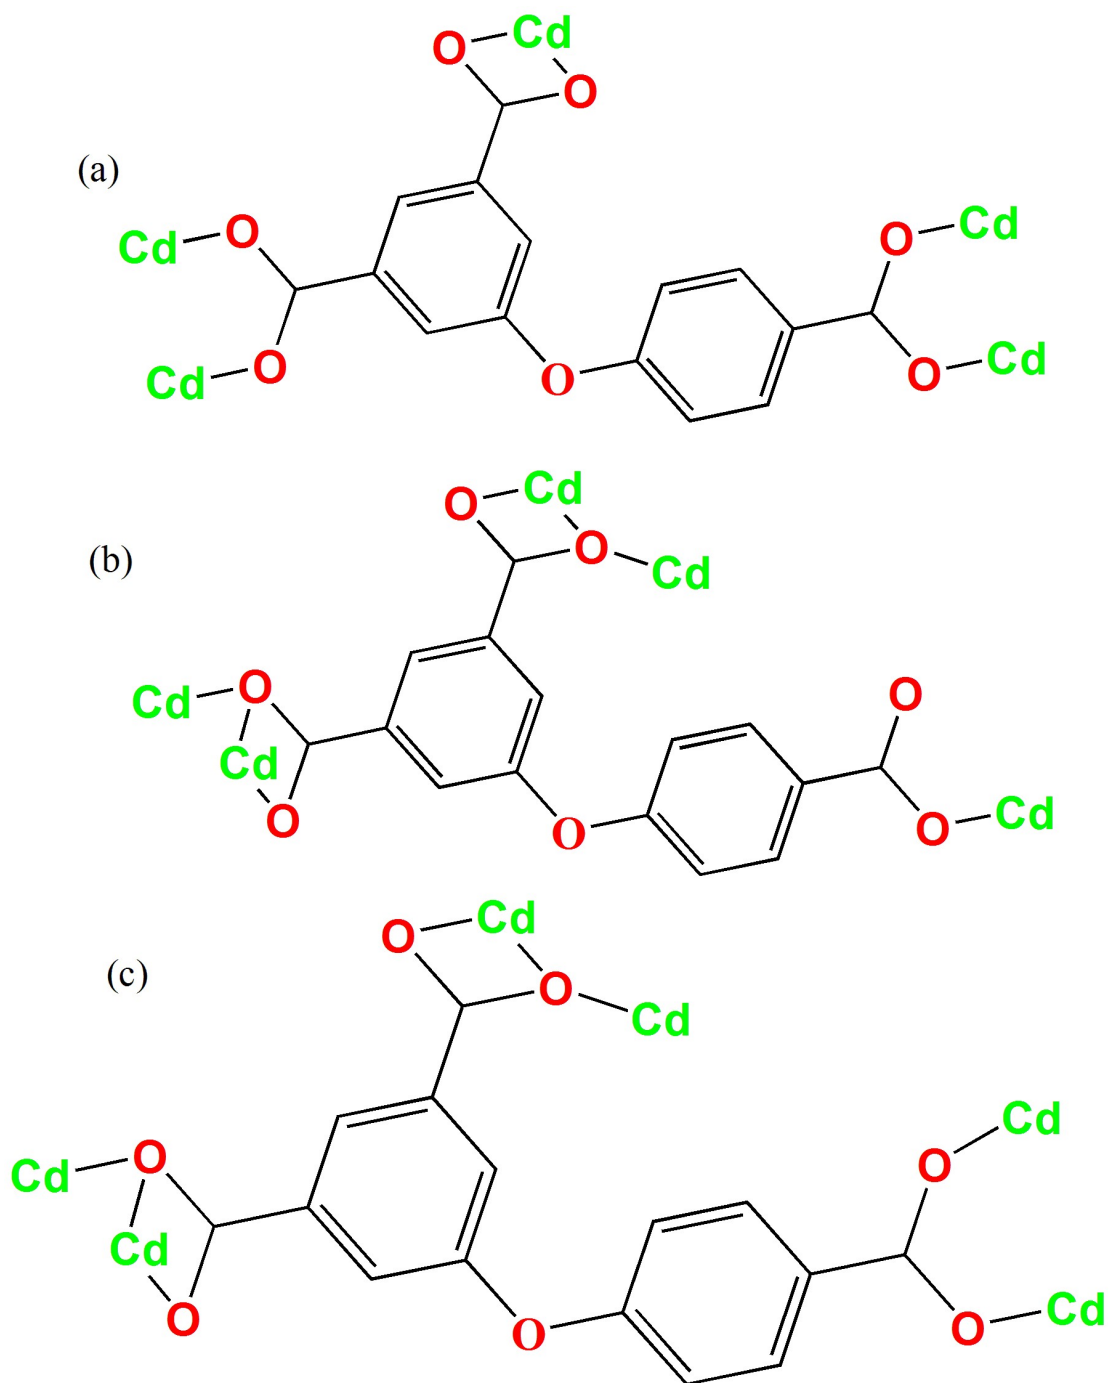

Scheme S1 view of the different coordination mode of H<sub>3</sub>L in this work.

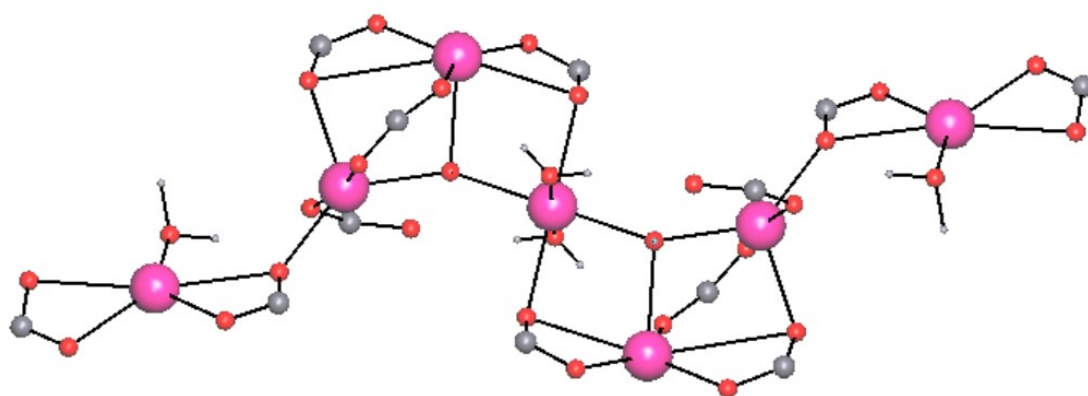

Fig. S1 view of the  $[\text{Cd}_7(\text{COO})_{12}]$  node.

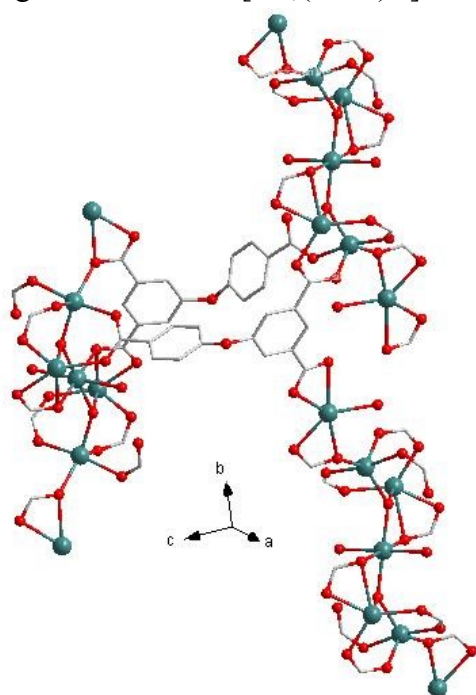

Fig. S2 view of the connections of the adjacent  $[\text{Cd}_7(\text{COO})_{12}]$  nodes.

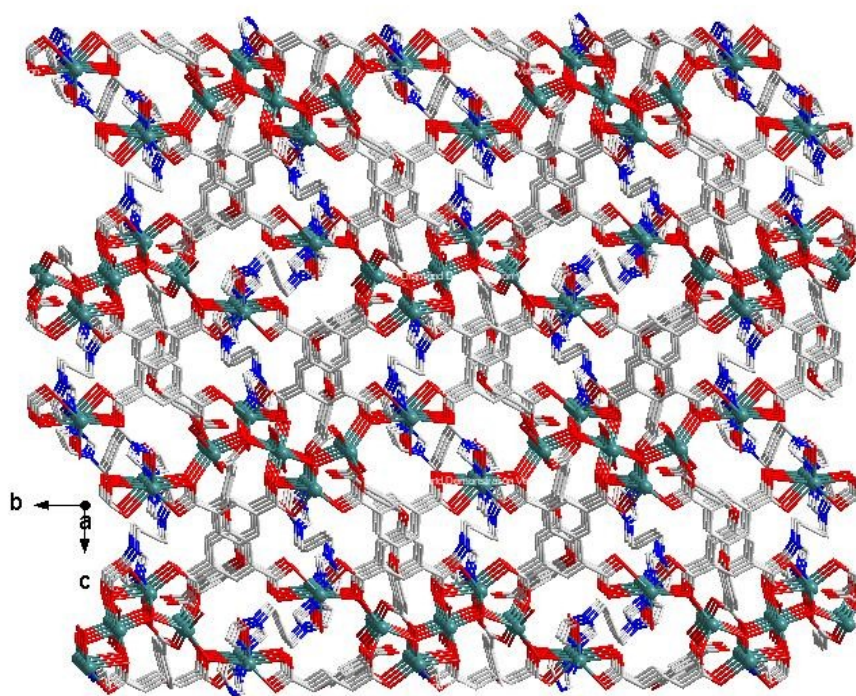

Fig.S3 the 3D supramolecular network.

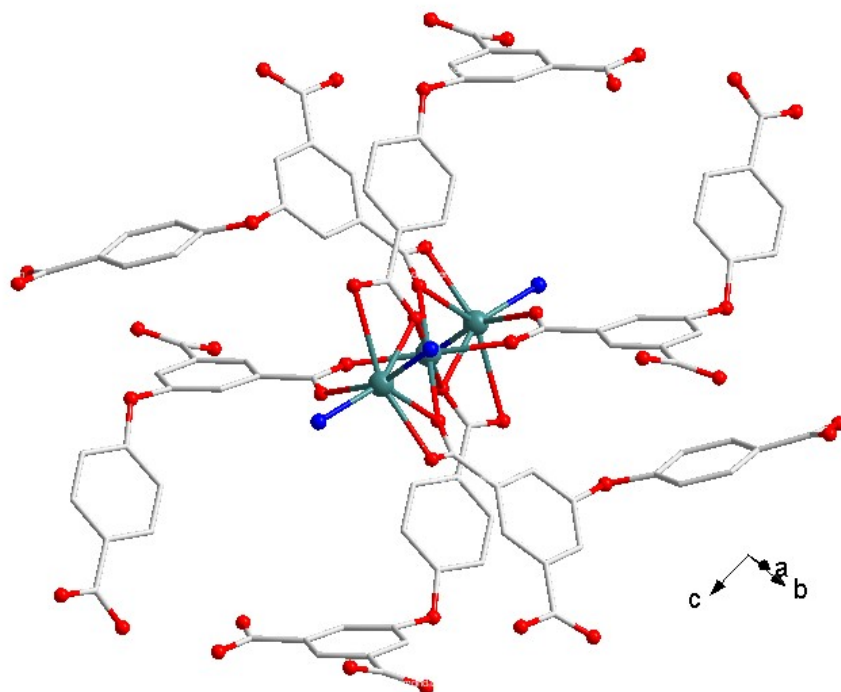

Fig. S4 view of the a trimeric  $[\text{Cd}_3(\text{COO})_6]$  SBU in **2**.

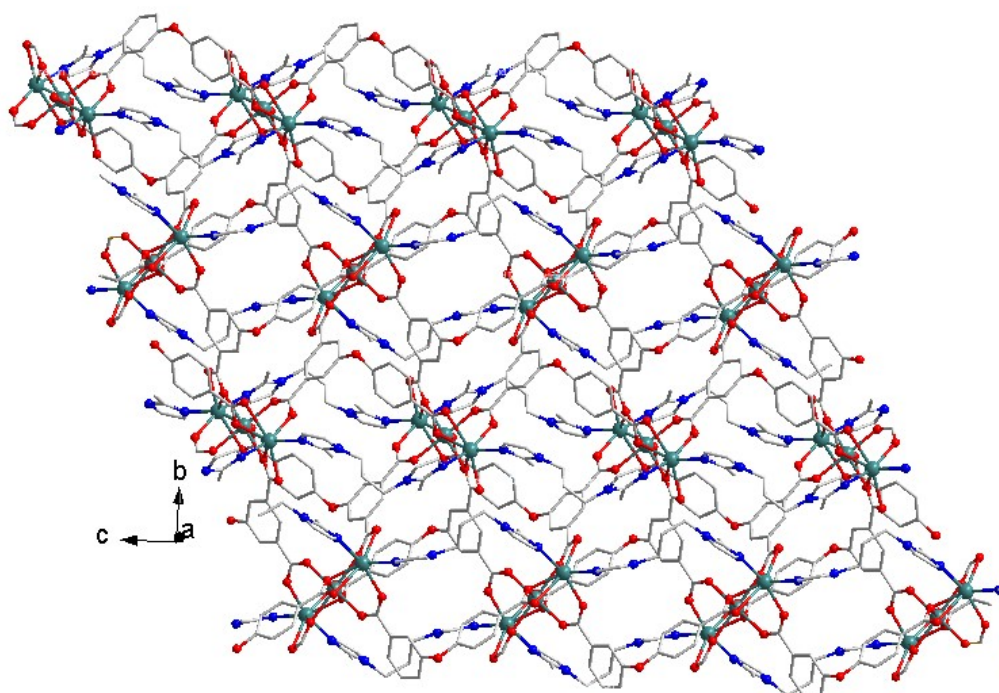

Fig. S5 view of the 2D layer in 2.

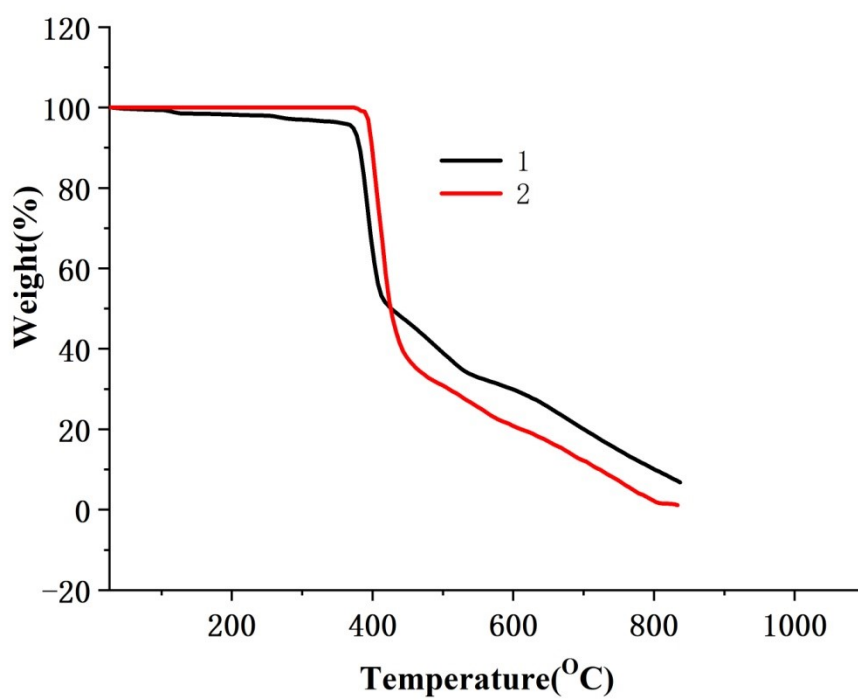

Fig. S6 view of the TGA.

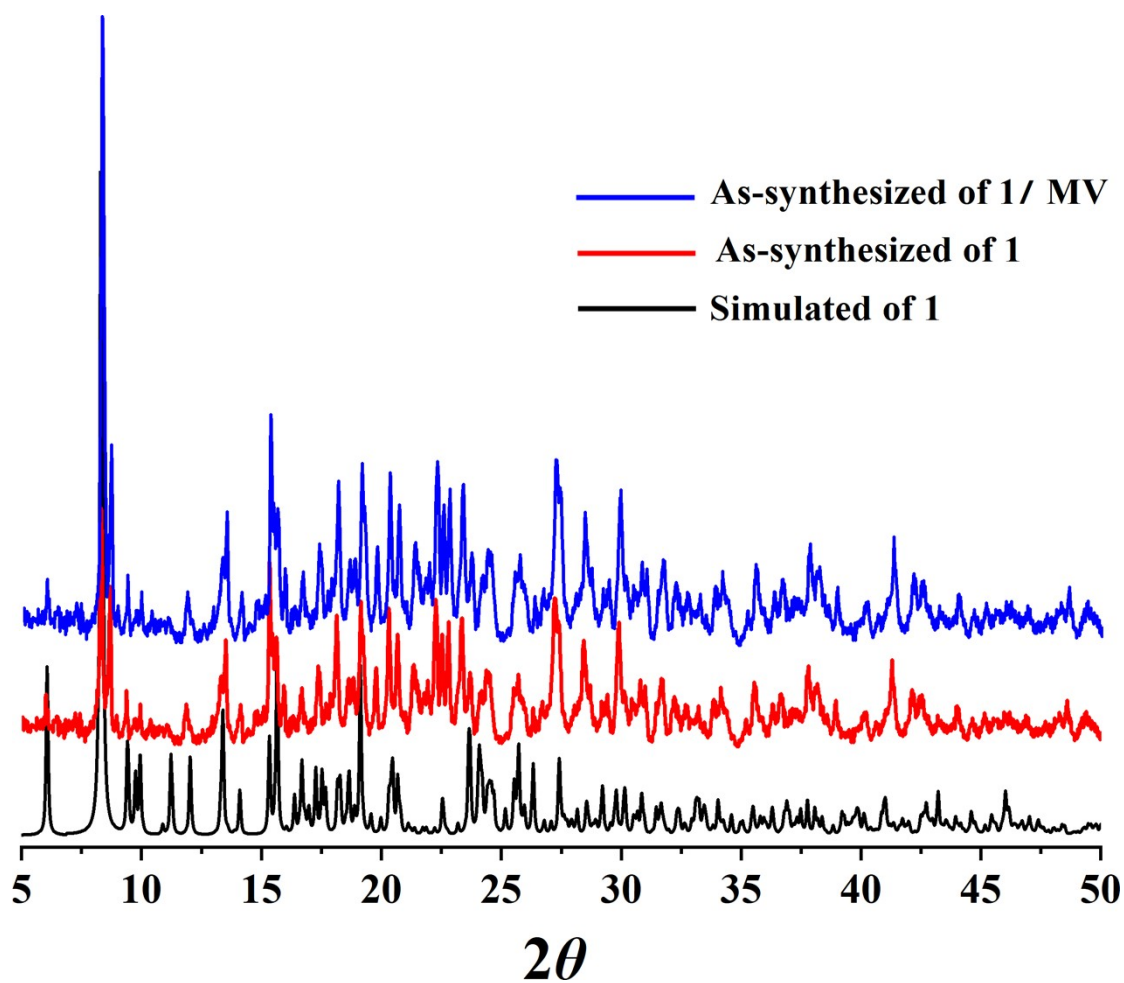

Fig. S7 view of the PXRD patterns of as-synthesized and after photocatalysis of MV in 1.

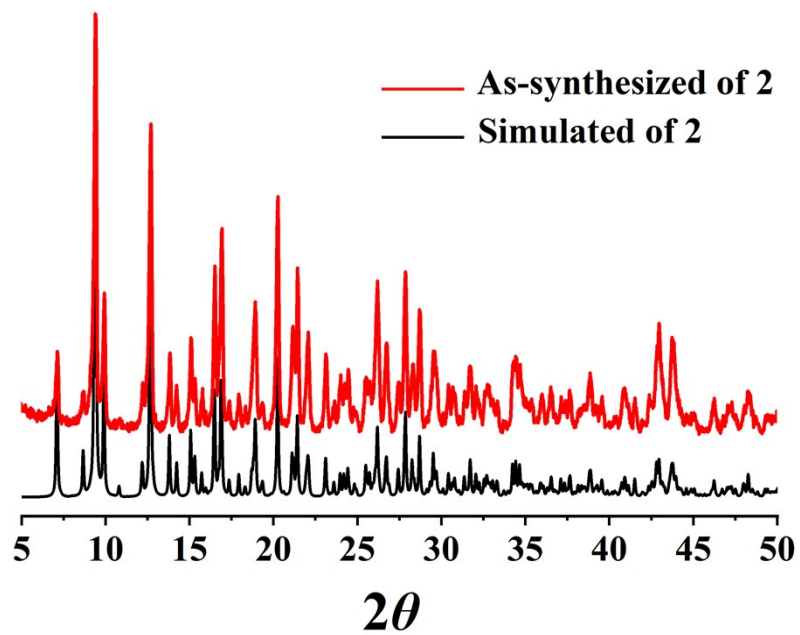

Fig. S8 the PXRD pattern of as-synthesized sample in 2.



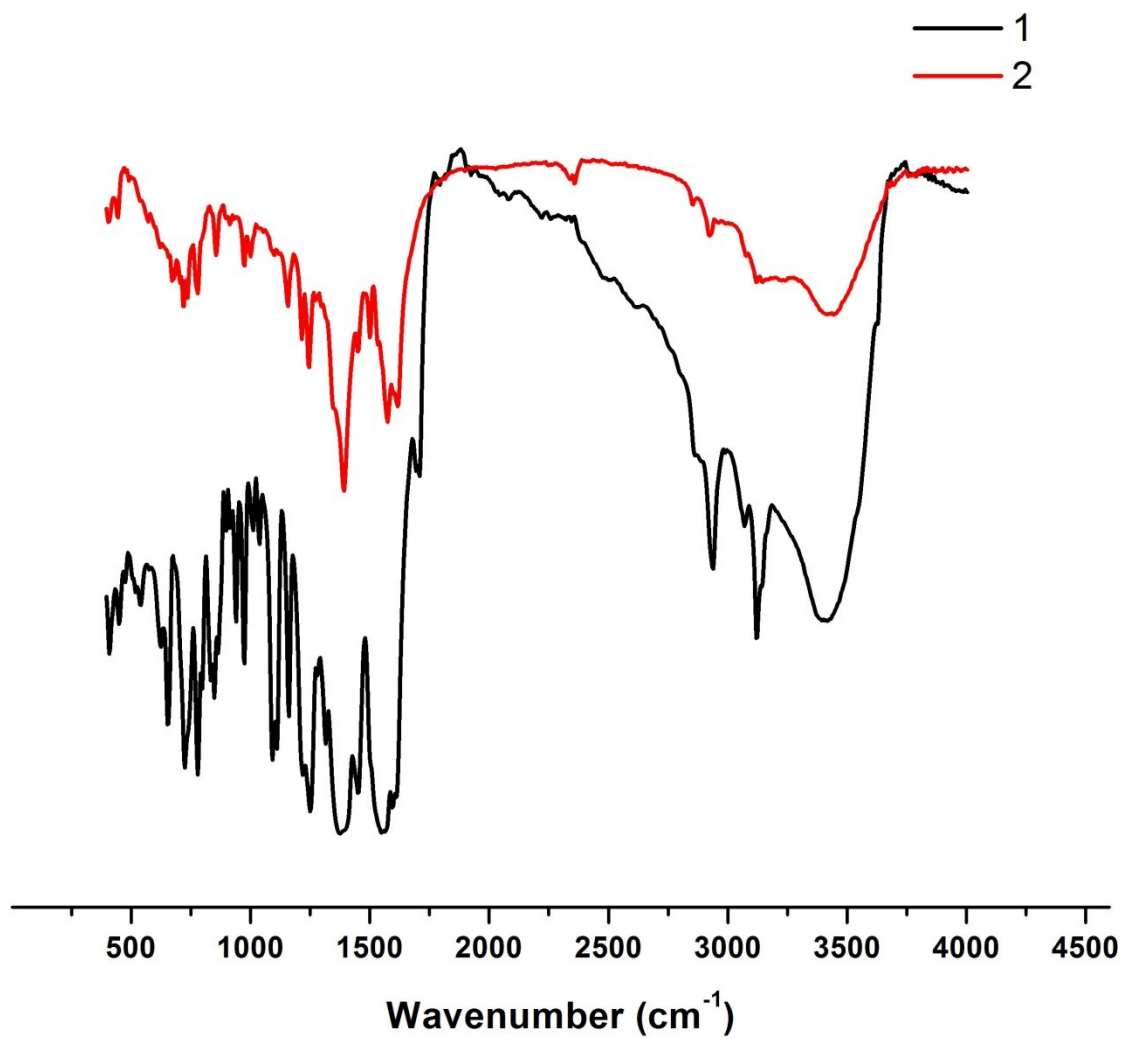

**Wavenumber ( $\text{cm}^{-1}$ )**

Fig. S9 view of the IR.

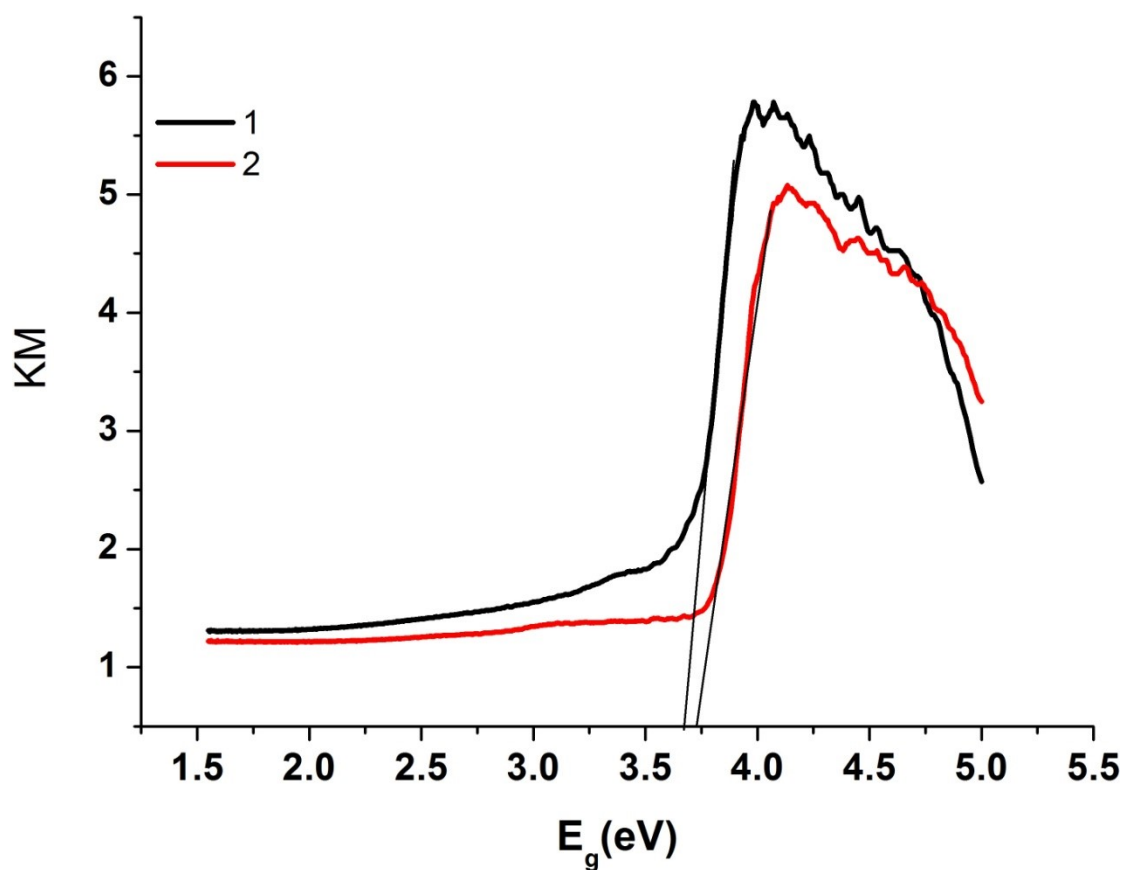

Fig. S10 UV-vis spectrum of 1 and 2.

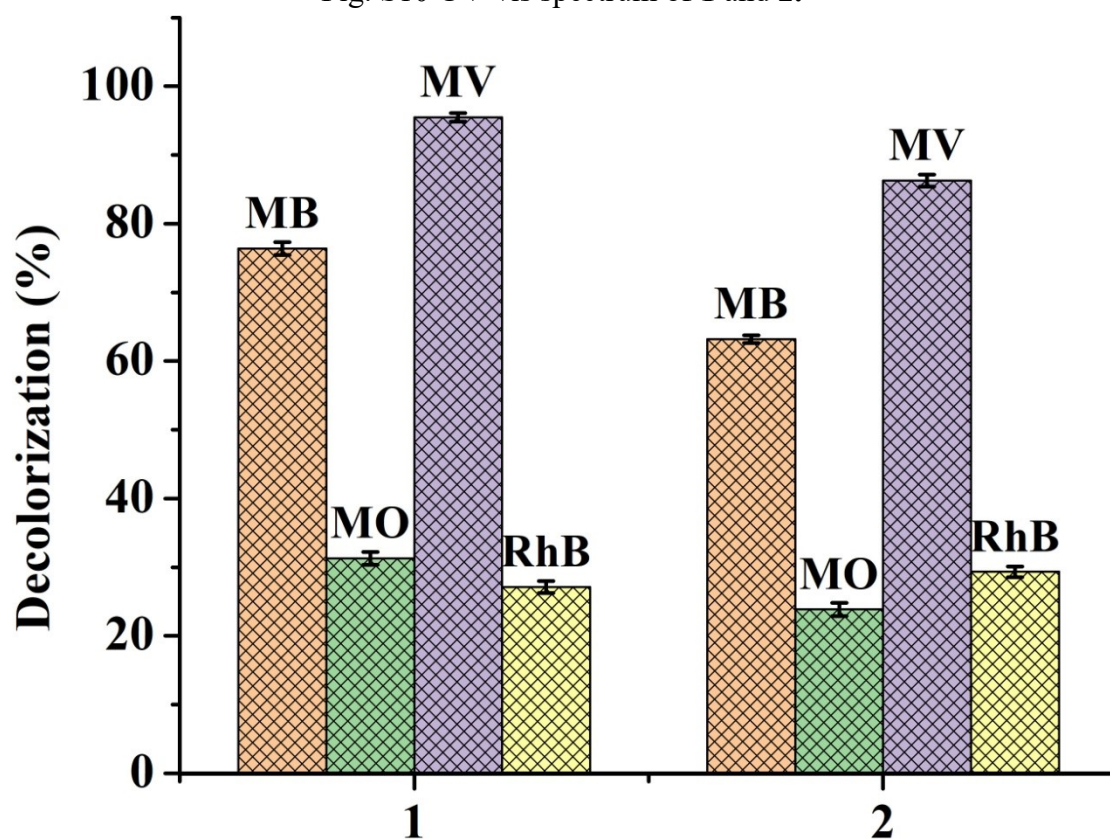

Fig. S11 view of the photocatalytic efficiency of MOFs 1 and 2.

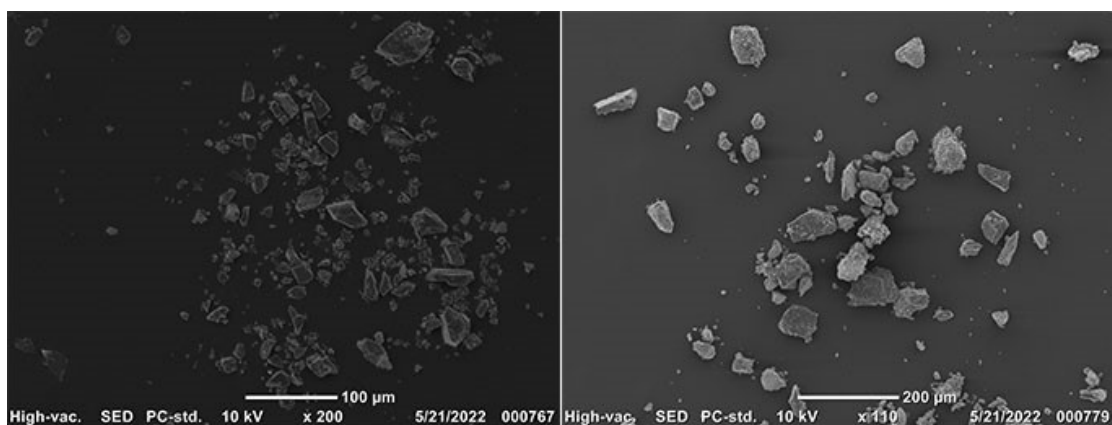

Fig. S12 the appearance of SEM before and after the catalytic experiment.

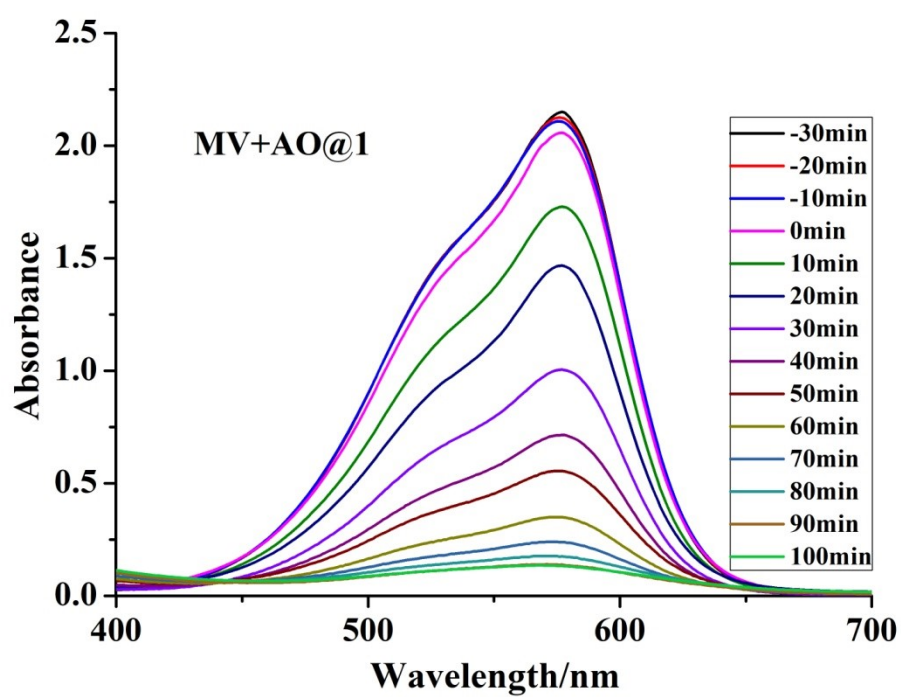

Fig. S13 Time-dependent UV-vis absorption spectra of 1+AO in MV solution.

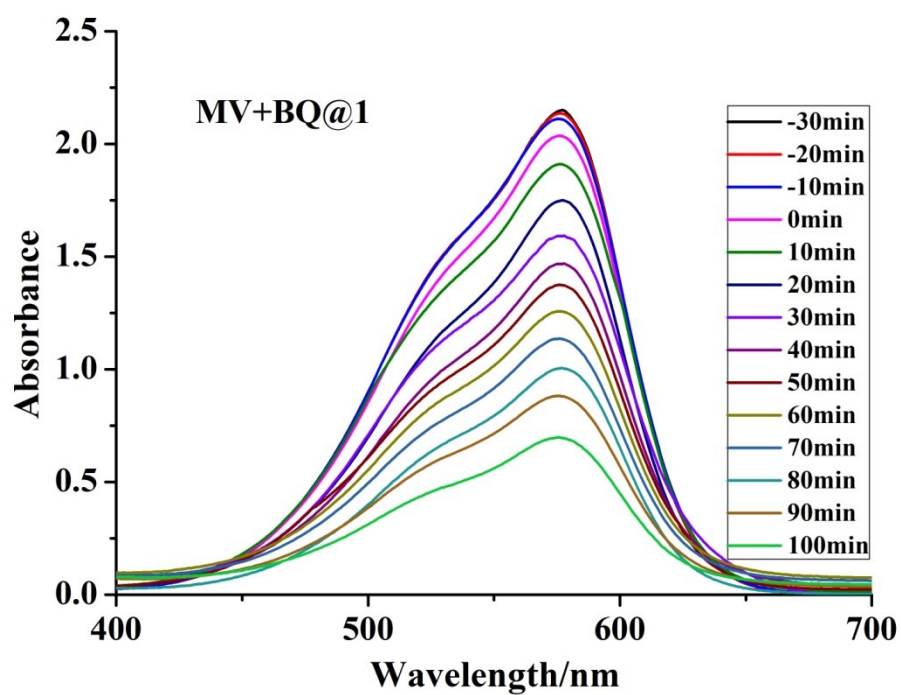

Fig. S14 Time-dependent UV-vis absorption spectra of **1+BQ** in MV solution.

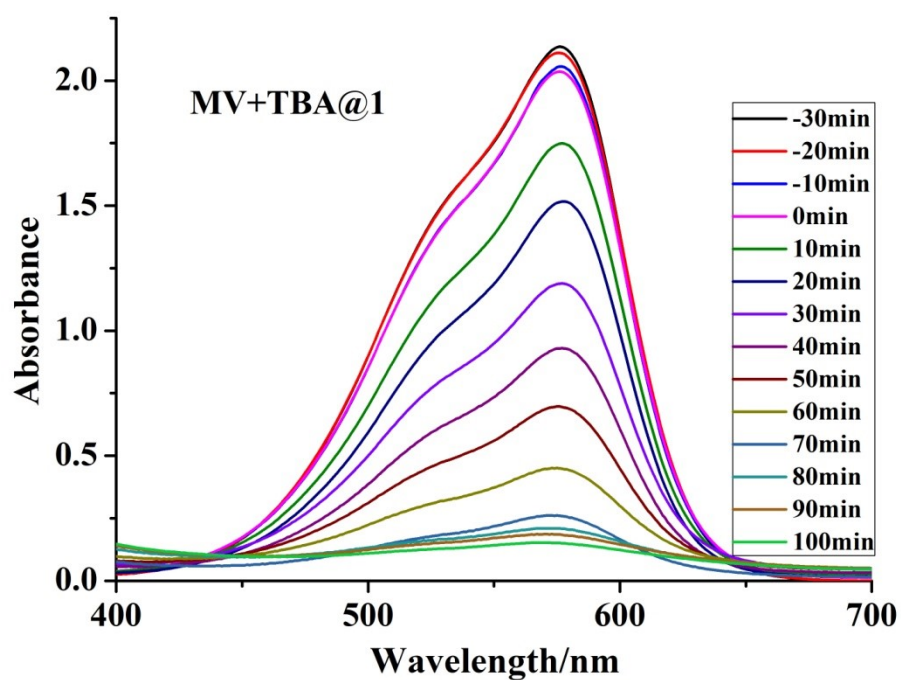

Fig. S15 Time-dependent UV-vis absorption spectra of **1+TBA** in MV solution.

Table S1 view of the photocatalytic efficiencies of **1** and **2**.

|            | <b>Blank</b>  | <b>1</b>       | <b>2</b>       |
|------------|---------------|----------------|----------------|
| <b>MB</b>  | <b>11.58%</b> | <b>76.4 %</b>  | <b>63.2 %</b>  |
| <b>MO</b>  | <b>18.98%</b> | <b>31.28 %</b> | <b>23.86%</b>  |
| <b>MV</b>  | <b>28.92%</b> | <b>95.5 %</b>  | <b>86.28 %</b> |
| <b>RhB</b> | <b>18.91%</b> | <b>27.13 %</b> | <b>29.32 %</b> |

Table S2 The fitting parameters of photocatalytic process

| <b>Material</b> | <b><math>k</math> (min<sup>-1</sup>)</b> | <b><math>R^2</math></b> |
|-----------------|------------------------------------------|-------------------------|
| <b>1+MB</b>     | <b>0.01174</b>                           | <b>0.99288</b>          |
| <b>1+MO</b>     | <b>0.00326</b>                           | <b>0.98976</b>          |
| <b>1+MV</b>     | <b>0.02288</b>                           | <b>0.98436</b>          |
| <b>1+RhB</b>    | <b>0.00230</b>                           | <b>0.97677</b>          |
| <b>AO+MV@1</b>  | <b>0.03210</b>                           | <b>0.98691</b>          |
| <b>BQ+MV@1</b>  | <b>0.00866</b>                           | <b>0.99522</b>          |
| <b>TBA+MV@1</b> | <b>0.03016</b>                           | <b>0.97020</b>          |
| <b>2+MB</b>     | <b>0.00860</b>                           | <b>0.98797</b>          |
| <b>2+MO</b>     | <b>0.00221</b>                           | <b>0.98008</b>          |
| <b>2+MV</b>     | <b>0.02215</b>                           | <b>0.98863</b>          |

**2+RhB****0.00257****0.97937****Table S3. Crystallographic data and structure refinement details for 1-2**

| Parameter                                                                             | 1                                                                               | 2                                                                              |
|---------------------------------------------------------------------------------------|---------------------------------------------------------------------------------|--------------------------------------------------------------------------------|
| Formula                                                                               | C <sub>90</sub> H <sub>80</sub> Cd <sub>7</sub> N <sub>12</sub> O <sub>34</sub> | C <sub>52</sub> H <sub>46</sub> Cd <sub>3</sub> N <sub>8</sub> O <sub>14</sub> |
| Formula weight                                                                        | 2660.46                                                                         | 1344.17                                                                        |
| Crystal system                                                                        | Monoclinic                                                                      | Monoclinic                                                                     |
| Space group                                                                           | <i>P21/n</i>                                                                    | <i>P21/c</i>                                                                   |
| Crystal Color                                                                         | Colorless                                                                       | Colorless                                                                      |
| <i>a</i> , Å                                                                          | 11.0799(7)                                                                      | 12.6780(12)                                                                    |
| <i>b</i> , Å                                                                          | 20.0518(14)                                                                     | 17.8838(17)                                                                    |
| <i>c</i> , Å                                                                          | 21.6998(14)                                                                     | 11.3101(11)                                                                    |
| $\alpha$ , °                                                                          | 90                                                                              | 90                                                                             |
| $\beta$ , °                                                                           | 102.557(1)                                                                      | 101.053(2)                                                                     |
| $\gamma$ , °                                                                          | 90                                                                              | 90                                                                             |
| <i>V</i> , Å <sup>3</sup>                                                             | 4705.8(5)                                                                       | 2516.8(4)                                                                      |
| <i>Z</i>                                                                              | 2                                                                               | 2                                                                              |
| $\rho_{\text{calcd}}$ , g/cm <sup>3</sup>                                             | 1.878                                                                           | 1.774                                                                          |
| $\mu$ , mm <sup>-1</sup>                                                              | 1.644                                                                           | 1.333                                                                          |
| <i>F</i> (000)                                                                        | 2624                                                                            | 1340                                                                           |
| $\theta$ Range, deg                                                                   | 1.4-27.7                                                                        | 1.6-27.7                                                                       |
| Reflection Collected                                                                  | 28422                                                                           | 14986                                                                          |
| Independent reflections ( <i>R</i> <sub>int</sub> )                                   | 0.051                                                                           | 0.029                                                                          |
| Reflections with <i>I</i> > 2 $\sigma$ ( <i>I</i> )                                   | 7719                                                                            | 4724                                                                           |
| Number of parameters                                                                  | 661                                                                             | 351                                                                            |
| <i>R</i> <sub>1</sub> , <i>wR</i> <sub>2</sub> ( <i>I</i> > 2 $\sigma$ ( <i>I</i> ))* | 0.0547, 0.1364                                                                  | 0.0295, 0.0768                                                                 |
| <i>R</i> <sub>1</sub> , <i>wR</i> <sub>2</sub> (all data)**                           | 0.0865, 0.1586                                                                  | 0.0411, 0.0905                                                                 |

\*  $R = \sum(F_o - F_c) / \sum(F_o)$ , \*\*  $wR_2 = \{\sum[w(F_{O(2)} - F_c)^2] / \sum(F_{O(2)})^2\}^{1/2}$ .

**Table S4.** Selected bond distances (Å) and angles (deg) for **1-2**

| 1                     |            |                       |            |
|-----------------------|------------|-----------------------|------------|
| Cd(1)-O(1)            | 2.198(5)   | Cd(1)-O(14)           | 2.224(4)   |
| Cd(1)-O(15)           | 2.216(4)   | Cd(1)-O(5)#5          | 2.255(5)   |
| Cd(1)-O(9)#5          | 2.245(6)   | Cd(2)-O(12)           | 2.300(4)   |
| Cd(2)-O(15)           | 2.220(4)   | Cd(2)-O(16)           | 2.382(7)   |
| Cd(2)-O(12)#4         | 2.300(4)   | Cd(2)-O(15)#4         | 2.220(4)   |
| Cd(2)-O(16)#4         | 2.382(7)   | Cd(3)-O(4)            | 2.251(5)   |
| Cd(3)-N(1)            | 2.257(7)   | Cd(3)-O(11)#2         | 2.347(5)   |
| Cd(3)-O(12)#2         | 2.538(4)   | Cd(3)-O(2)#6          | 2.308(5)   |
| Cd(3)-O(15)#6         | 2.315(5)   | Cd(4)-O(17)           | 2.365(4)   |
| Cd(4)-N(4)            | 2.276(7)   | Cd(4)-N(5)            | 2.272(7)   |
| Cd(4)-O(13)#1         | 2.412(4)   | Cd(4)-O(14)#1         | 2.511(4)   |
| Cd(4)-O(6)#3          | 2.317(4)   | Cd(4)-O(7)#3          | 2.577(4)   |
| 2                     |            |                       |            |
| Cd(1)-O(4)            | 2.274(3)   | Cd(1)-N(1)            | 2.293(2)   |
| Cd(1)-O(1)#1          | 2.680(3)   | Cd(1)-O(2)#1          | 2.326(2)   |
| Cd(1)-N(4)#1          | 2.336(3)   | Cd(1)-O(6)#2          | 2.582(3)   |
| Cd(1)-O(7)#2          | 2.395(3)   | Cd(2)-O(5)            | 2.214(2)   |
| Cd(2)-O(2)#1          | 2.287(2)   | Cd(2)-O(6)#2          | 2.329(2)   |
| Cd(2)-O(5)#3          | 2.214(2)   | Cd(2)-O(2)#4          | 2.287(2)   |
| Cd(2)-O(6)#5          | 2.329(2)   |                       |            |
| 1                     |            |                       |            |
| O(1)-Cd(1)-O(14)      | 87.93(17)  | O(1)-Cd(1)-O(1)5      | 95.3(2)    |
| O(1)-Cd(1)-O(5)#5     | 88.71(19)  | O(1)-Cd(1)-O(9)#5     | 170.2(2)   |
| O(14)-Cd(1)-O(1)5     | 137.33(16) | O(5)#5-Cd(1)-O(14)    | 124.71(18) |
| O(9)#5-Cd(1)-O(14)    | 86.9(2)    | O(5)#5-Cd(1)-O(1)5    | 97.93(19)  |
| O(9)#5-Cd(1)-O(15)    | 94.2(2)    | O(5)#5-Cd(1)-O(9)#5   | 87.5(2)    |
| O(12)-Cd(2)-O(15)     | 97.67(16)  | O(12)-Cd(2)-O(16)     | 85.39(19)  |
| O(12)-Cd(2)-O(12)#4   | 180.00     | O(12)-Cd(2)-O(15)#4   | 82.33(16)  |
| O(12)-Cd(2)-O(16)#4   | 94.61(19)  | O(15)-Cd(2)-O(16)     | 81.6(2)    |
| O(12)#4-Cd(2)-O(15)   | 82.33(16)  | O(15)-Cd(2)-O(15)#4   | 180.00     |
| O(15)-Cd(2)-O(16)#4   | 98.4(2)    | O(12)#4-Cd(2)-O(16)   | 94.61(19)  |
| O(15)#4-Cd(2)-O(16)   | 98.4(2)    | O(16)-Cd(2)-O(16)#4   | 180.00     |
| O(12)#4-Cd(2)-O(15)#4 | 97.67(16)  | O(12)#4-Cd(2)-O(16)#4 | 85.39(19)  |
| O(15)#4-Cd(2)-O(16)#4 | 81.6(2)    | O(4) -Cd(3)-N(1)      | 95.2(2)    |
| O(4) -Cd(3)-O(11)#2   | 84.11(18)  | O(4) -Cd(3)-O(12)#2   | 136.31(18) |
| O(2)#6-Cd(3)-O(4)     | 126.3(2)   | O(4) -Cd(3)-O(15)#6   | 98.6(2)    |
| O(11)#2-Cd(3)-N(1)    | 96.9(2)    | O(12)#2-Cd(3)-N(1)    | 99.32(18)  |
| O(2)#6-Cd(3)-N(1)     | 83.4(2)    | O(15)#6-Cd(3)-N(1)    | 164.4(2)   |
| O(11)#2-Cd(3)-O(12)#2 | 53.46(14)  | O(2)#6-Cd(3)-O(11)#2  | 149.58(18) |
| O(11)#2-Cd(3)-O(15)#6 | 91.71(17)  | O(2)#6-Cd(3)-O(12)#2  | 96.33(18)  |

|                       |            |                       |            |
|-----------------------|------------|-----------------------|------------|
| O(12)#2-Cd(3)-O(15)#6 | 75.48(14)  | O(2)#6-Cd(3)-O(15)#6  | 82.57(18)  |
| O(17)-Cd(4)-N(4)      | 86.3(2)    | O(17)-Cd(4)-N(5)      | 88.6(2)    |
| O(13)#1-Cd(4)-O(17)   | 136.49     | O(14)#1-Cd(4)-O(17)   | 83.63(18)  |
| O(6)#3-Cd(4)-O(17)    | 135.21(18) | O(7)#3-Cd(4)-O(17)    | 84.71(18)  |
| N(4)-Cd(4)-N(5)       | 171.3(2)   | O(13)#1-Cd(4)-N(4)    | 90.6(2)    |
| O(14)#1-Cd(4)-N(4)    | 86.06(18)  | O(6)#3-Cd(4)-N(4)     | 86.6(2)    |
| O(7)#3-Cd(4)-N(4)     | 99.3(2)    | O(13)#1-Cd(4)-N(5)    | 88.3(2)    |
| O(14)#1-Cd(4)-N(5)    | 86.41(18)  | O(6)#3-Cd(4)-N(5)     | 102.0(2)   |
| O(7)#3-Cd(4)-N(5)     | 87.1(2)    | O(13)#1-Cd(4)-O(14)#1 | 52.86(14)  |
| O(6)#3-Cd(4)-O(13)#1  | 87.73(15)  | O(7)#3-Cd(4)-O(13)#1  | 138.40(14) |
| O(6)#3-Cd(4)-O(14)#1  | 139.74(14) | O(7)#3-Cd(4)-O(14)#1  | 166.80(14) |
| O(6)#3-Cd(4)-O(7)#3   | 53.12(14)  |                       |            |
| <b>2</b>              |            |                       |            |
| O(4)-Cd(1)-N(1)       | 80.73(9)   | O(2)#1-Cd(2)-O(2)#4   | 180.00     |
| O(1)#1-Cd(1)-O(4)     | 85.33(8)   | O(2)#1-Cd(2)-O(6)#5   | 104.29(8)  |
| O(2)#1-Cd(1)-O(4)     | 88.08(8)   | O(5)#3-Cd(2)-O(6)#2   | 84.92(8)   |
| O(4)-Cd(1)-N(4)#1     | 162.22(9)  | O(2)#4-Cd(2)-O(6)#2   | 104.29(8)  |
| O(4)-Cd(1)-O(6)#2     | 81.54(8)   | O(6)#2-Cd(2)-O(6)#5   | 180.00     |
| O(4)-Cd(1)-O(7)#2     | 108.40(9)  | O(2)#4-Cd(2)-O(5)#3   | 90.91(9)   |
| O(1)#1-Cd(1)-N(1)     | 103.72(9)  | O(5)#3-Cd(2)-O(6)#5   | 95.08(8)   |
| O(2)#1-Cd(1)-N(1)     | 154.00(9)  | O(2)#4-Cd(2)-O(6)#5   | 75.71(8)   |
| N(1)-Cd(1)-N(4)#1     | 99.84(9)   | O(6)#2-Cd(1)-N(1)     | 130.13(8)  |
| O(7)#2-Cd(1)-N(1)     | 91.26(9)   | O(1)#1-Cd(1)-O(2)#1   | 51.68(8)   |
| O(1)#1-Cd(1)-N(4)#1   | 77.24(9)   | O(1)#1-Cd(1)-O(6)#2   | 120.75(7)  |

Symmetry Codes: **For 1:** #1 = 2+x, y, z; #2 = -1/2-x, 1/2+y, 1/2-z; #3 = 3/2-x, 1/2+y, 1/2-z; #4 = -1-x, 1-y, 1-z; #5 = -1/2+x, 3/2-y, 1/2+z; #6 = 1/2+x, 3/2-y, -1/2+z. **For 2:** #1 = x, y, -1+z; #2 = 1-x, 1/2+y, 1/2-z; #3 = 1-x, 1-y, -z; #4 = 1-x, 1-y, 1-z; #5 = x, 1/2-y, -1/2+z.
